# Supplementary material for: Thermodynamically stable structure of hydroxy alkane sulfonate surfactant monomers in water achieving high water solubility and a low CMC
Source: Royal Society of Chemistry journal article supplement (doi:10.1039/d1ra01046h), 2021-01-01
Supplement: d1ra01046h1.pdf [file d1ra01046h1.pdf]

Fig. S1  $^1\text{H}$  NMR spectrum of the purified C16-4S-5OH monohydrate.

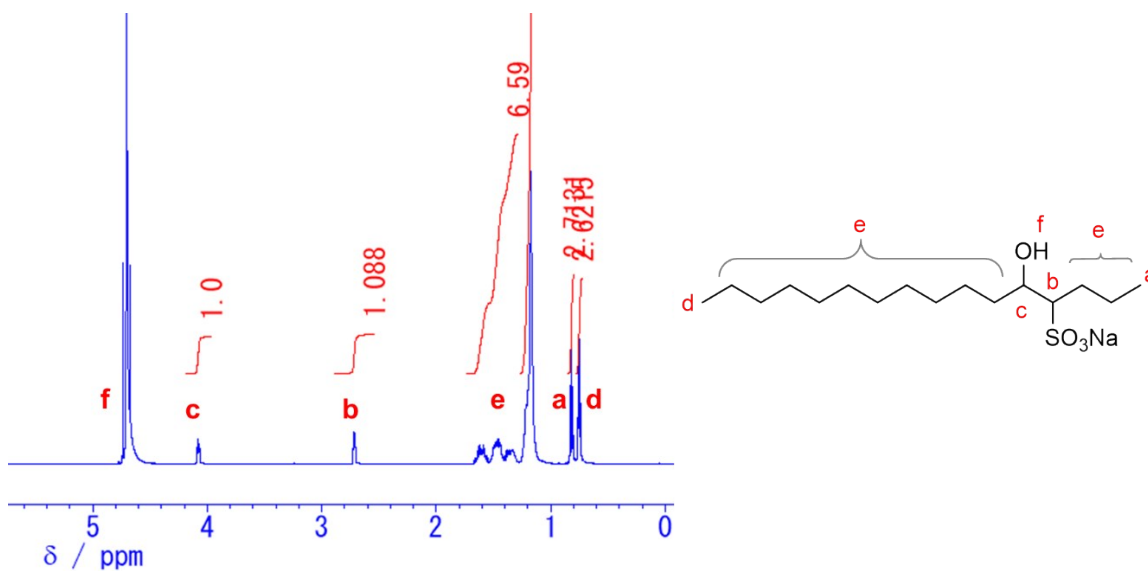

Fig. S2 LC-MS/MS Spectrum of the purified C16-4S-5OH monohydrate

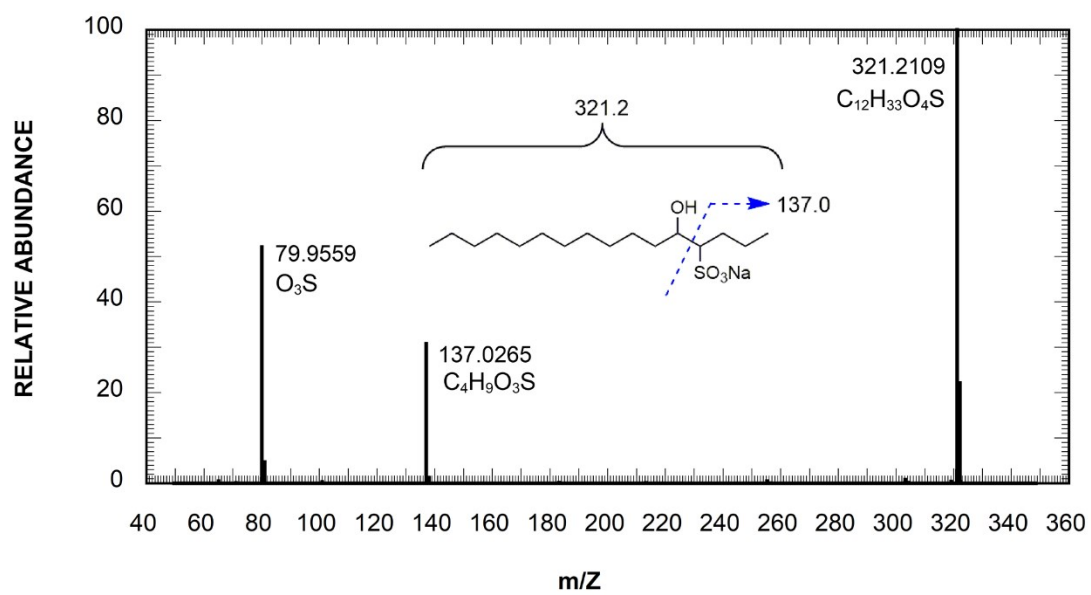

**Table S1 Elemental analysis results for the purified C16-4S-5OH monohydrate**

Chemical Formula:  $C_{16}H_{33}O_4SNa \cdot H_2O$

Molecular Weight: 362.47

| <b>Calculated:</b> | C    | H   | N    | O    | S   | Na  |
|--------------------|------|-----|------|------|-----|-----|
| Number             | 16   | 35  | 0    | 5    | 1   | 1   |
| wt%                | 53.0 | 9.7 | 0.0  | 22.1 | 8.8 | 6.3 |
| <b>Measured:</b>   |      |     |      |      |     |     |
| wt%                | 52.4 | 9.6 | <0.3 | 22.5 | 8.8 | 6.2 |

**Experimental:**

**C, H, N analysis.** These analyses were performed using a CHN Corder MT-6 (Yanako Technical Science, Japan) with the sample, ignition and absorption zones set at 950, 850 and 500 °C, respectively.

**O analysis.** These analyses were performed using a varioEL III (Elementar, Germany) with the ignition zone set at 1150 °C.

**S analysis.** The sample was first decomposed by ignition and the gaseous products were collected in an aqueous  $H_2O_2$  solution. After the gas volume was determined, the  $SO_4^{2-}$  concentration was measured by ion chromatography using an ICS-6000 instrument (Thermo-Fischer Scientific Inc., USA).

**Na analysis.** The sample was heated to ash and then dissolved in dilute  $HNO_3$ , after which the Na concentration was determined using a 730-ES inductively coupled plasma optical emission spectroscopy apparatus (Varian Inc., USA).
